# Supplementary material for: Weight Loss Treatment and Longitudinal Weight Change Among Primary Care Patients With Obesity
Source: PubMed Central journal article supplement (PMC10870179; doi:10.1001/jamanetworkopen.2023.56183), 2024-02-15
Supplement: jamanetwopen-e2356183-s002.pdf [file jamanetwopen-e2356183-s002.pdf]

## Data Sharing Statement

Henderson. Weight Loss Treatment and Longitudinal Weight Change Among Primary Care Patients With Obesity. *JAMA Netw Open*. Published February 15, 2024.  
doi:10.1001/jamanetworkopen.2023.56183

### Data

**Data available:** No
